Nach diesen Werten werden nur etwa 7 % des im Unterstrom in das Kattegatt geführten Wassers von 33 ‰ bis in die Ostsee transportiert, während die übrigen 93 ‰ sich mit dem Ostseewasser zu dem in das Skagerrak fließenden Wasser des baltischen Stromes vermischen. Weiter wird etwa ein Drittel des im Oberstrom westlich des Arkonabeckens die Ostsee verlassenden Wassers wieder durch den Unterstrom in die Ostsee zurückgeführt. Diese Werte zeigen, welche hervorragende Bedeutung die Mischungsvorgänge in diesen Gebieten haben. Dies geht u. a. auch daraus hervor, dass nach den Beobachtungen von JACOBSEN der ausgehende Strom im grossen Belt auf geringeren Tiefen, wo kein Unterstrom vorhanden ist, gewöhnlich grössere Geschwindigkeit besitzt, als auf grösseren Tiefen, wo der Unterstrom voll ausgebildet ist.

Weiter berechnet der Verfasser unter Benutzung der WITTING'schen Mittelwerte den Wasseraustausch zwischen Nordsee und verschiedenen Teilen der Ostsee und findet u. a. folgendes: »Von dem insgesamt bis in die Ostsee geführten atlantischen Wasser gelangen zwei Fünftel in den Finnischen und Bottnischen Meerbusen und ein Zehntel bis in die Bottenwiek«. Die Mischung in der Ostsee zwischen Ober- und Unterstrom ist somit viel kleiner als im Grenzgebiet zwischen Ost- und Nordsee.

Bei Untersuchung des Wasseraustausches in einzelnen Monaten oder in ganz speziellen Fällen ergibt sich ein ganz anderes Bild. Der Verfasser bemerkt, dass die Untersuchungen von WITTING und JACOBSEN einen ausgeprägten jährlichen Gang in den Abflussmengen ergeben haben (Maximum im Frühling). Weiter wird die Frage der internen Wellen und ihre Bedeutung für den Wasseraustausch berührt; die Wirkungen solcher internen Wellen, deren Bedeutung besonders O. PETERSSON hervorgehoben hat, sind jedoch noch nicht genügend nachgeprüft. Auch neue Untersuchungen über säkulare Schwankungen der Schonenfischerei geben keine Anhaltspunkte für die Annahme säkularer, kosmischer Schwankungen in dem Wasseraustausch. Dagegen wird an einigen Beispielen gezeigt, welche grosse Bedeutung für die Fischerei das wahrscheinlich meteorologisch bedingte »kaskadenartige« Vordringen von Wasser aus dem Kattegatt in die Beltsee und weiter in die Ostsee hat. Eine Zusammenstellung von Extremwerten des Salzgehaltes bei den Feuerschiffen Drogden und Gjedser-Riff gibt eine gute Vorstellung von dieser Erscheinung. E. PALMÉN.

H. THORADE. Ebbe und Flut in der Nordsee. Ein geschichtlicher Rückblick. Petermann's Mitteilungen. Ergänzungsheft Nr. 209. Gotha, 1930.

This article represents a piece of scholarship of a type which one could wish were more frequent. In approximately chronological order it follows all the attempts that have been made during the last hundred years to elucidate a well-defined subject of mathematical, physical, geographical, navigational and general interest, assigning these attempts to natural scientific epochs and indicating their significance from wider points of view. Dr. THORADE has a complete mastery of his subject, so that one of his sentences often summarises the results of a close study of a number of

memoirs. As he points out, the tides of the North Sea have always served as a kind of touchstone by which to test hypotheses and methods of investigation, and in consequence, their study is associated with a long line of illustrious men, beginning with YOUNG, WHEWELL, AIRY and KELVIN and including the lately deceased STERNECK and MERZ. Dr. THORADE has heightened the human interest of his subject by apt references to the distinctive qualities in the genius of these men.

Tidal charts for the North Sea have appeared since 1833 but for ninety years they showed the most astonishing mutual contradictions. Then, almost simultaneously, three charts appeared, one in Germany, one in Austria and one in England, produced in entirely different ways and yet agreeing in their major features. In discussing the minor differences exhibited by these charts Dr. THORADE is scrupulously fair and he endeavours to soften, as far as the North Sea is concerned, the somewhat hard criticisms often aimed at the intrepid DEFANT by the thorough STERNECK.

The article ends with the enunciation of two outstanding questions and a hope that, as an avenue of research, the North Sea will lead to the oceans. The first of these outstanding questions concerns the effect of local variations of the depth of the sea on the curvature of the cotidal lines. In defence of the smoothly running lines of the chart prepared by DOODSON I should like to state my opinion that until one is sure which way a line curves it is better to draw it straight. The second outstanding question concerns the vagaries, over the North Sea and especially in the Skager Rack, of the maximum effects which follow new and full moon. In this connection I venture to suggest the following tentative explanation.

In the absence of friction the cotidal lines for the principal solar constituent would be similar to those for the principal lunar constituent except that, as the solar period is shorter, the solar amphidromic point to the north of Holland would lie to the south of the lunar one. The effect of friction on the solar constituent will be relatively smaller than on the lunar constituent owing to the smaller currents and therefore the solar amphidromic point will lie nearer the medial line of the sea than the lunar one, while there may be another solar amphidromic point off the south of Norway. It is this modification of the amphidromic points which may cause a relative diminution in phase-lag for the solar constituent on the eastern coasts of the sea.

J. PROUDMAN.

C. M. YONGE. *A Year on the Great Barrier Reef. The story of Corals and the greatest of their Creations.* (Putnam. London & New York). 1930.

Among the various books written on that great subject, the Coral Reefs — the classical book by DARWIN, SAVILLE KENT's splendid work on the Great Barrier Reef of Australia, WOOD-JONES' fine book on the Cocos Islands etc. — the present book easily maintains its rank in the first line, combining, as it does, a very clear representation of the scientific facts and theories relating to the coral reef problem in general with a vivid description of the investigations carried out by the Great Barrier Reef
